# Supplementary material
Source: MDPI journal article supplement (https://www.mdpi.com/2077-0472/13/5/953)
Supplement: s1 [file s1]

Archive with 2 entries (2 files):
- Table S1.pdf
- Figue S1.pdf
