# Supplementary material
Source: MDPI journal article supplement (https://www.mdpi.com/2077-0472/13/5/953)
Supplement: s1 [file s1 › Table S1.pdf]

**Table S1.** *Phaseolus* bean genotypes used for heat tolerance under moderate (field) and extreme (greenhouse) heat stress conditions.

| Genotype No | Species                   | Accession No. | Collection Place | Origin  |
|-------------|---------------------------|---------------|------------------|---------|
| G1          | <i>Phaseolus vulgaris</i> | Na            | Na               | Turkiye |
| G2          | <i>Phaseolus vulgaris</i> | APN 14013     | Rize             | Turkiye |
| G3          | <i>Phaseolus vulgaris</i> | APN 14014     | Amasya           | Turkiye |
| G4          | <i>Phaseolus vulgaris</i> | APN 14015     | Kütahya          | Turkiye |
| G5          | <i>Phaseolus vulgaris</i> | APN 14016     | Hatay            | Turkiye |
| G6          | <i>Phaseolus vulgaris</i> | APN 14017     | İstanbul         | Turkiye |
| G7          | <i>Phaseolus vulgaris</i> | APN 14023     | Kars             | Turkiye |
| G8          | <i>Phaseolus vulgaris</i> | APN 14026     | Gömbe/ Antalya   | Turkiye |
| G9          | <i>Phaseolus vulgaris</i> | APN 14029     | Burdur           | Turkiye |
| G10         | <i>Phaseolus vulgaris</i> | APN 14031     | Çumra/ Konya     | Turkiye |
| G11         | <i>Phaseolus vulgaris</i> | Na            | Na               | Turkiye |
| G12         | <i>Phaseolus vulgaris</i> | APN 14032     | Isparta          | Turkiye |
| G13         | <i>Phaseolus vulgaris</i> | APN 14036     | Kayseri          | Turkiye |
| G14         | <i>Phaseolus vulgaris</i> | APN 14040     | Çanakkale        | Turkiye |
| G15         | <i>Phaseolus vulgaris</i> | APN 14041     | Tekirdağ         | Turkiye |
| G16         | <i>Phaseolus vulgaris</i> | APN 14042     | Kırlareli        | Turkiye |
| G17         | <i>Phaseolus vulgaris</i> | APN 14043     | Kastamonu        | Turkiye |
| G18         | <i>Phaseolus vulgaris</i> | APN 14044     | Kırlareli        | Turkiye |
| G19         | <i>Phaseolus vulgaris</i> | APN 14049     | Niğde            | Turkiye |
| G20         | <i>Phaseolus vulgaris</i> | APN 14051     | Adana            | Turkiye |
| G21         | <i>Phaseolus vulgaris</i> | APN 14056     | Erzurum          | Turkiye |
| G22         | <i>Phaseolus vulgaris</i> | APN 14067     | Kütahya          | Turkiye |
| G23         | <i>Phaseolus vulgaris</i> | APN 14069     | Çorum            | Turkiye |
| G24         | <i>Phaseolus vulgaris</i> | APN 14070     | Amasya           | Turkiye |
| G25         | <i>Phaseolus vulgaris</i> | APN 14071     | Na               | Turkiye |
| G26         | <i>Phaseolus vulgaris</i> | APN 14072     | Na               | Turkiye |
| G27         | <i>Phaseolus vulgaris</i> | APN 14073     | Na               | Turkiye |
| G28         | <i>Phaseolus vulgaris</i> | APN 14074     | Na               | Turkiye |
| G29         | <i>Phaseolus vulgaris</i> | Na            | Na               | Turkiye |
| G30         | <i>Phaseolus vulgaris</i> | APN 14077     | Na               | Turkiye |
| G31         | <i>Phaseolus vulgaris</i> | APN 14078     | Na               | Turkiye |
| G32         | <i>Phaseolus vulgaris</i> | APN 14079     | Na               | Turkiye |
| G33         | <i>Phaseolus vulgaris</i> | APN 14080     | Na               | Turkiye |
| G34         | <i>Phaseolus vulgaris</i> | APN 14082     | Na               | Turkiye |
| G35         | <i>Phaseolus vulgaris</i> | Na            | Na               | Turkiye |
| G36         | <i>Phaseolus vulgaris</i> | APN 14083     | Na               | Turkiye |
| G37         | <i>Phaseolus vulgaris</i> | APN 14084     | Na               | Turkiye |
| G38         | <i>Phaseolus vulgaris</i> | APN 14085     | Na               | Turkiye |
| G39         | <i>Phaseolus vulgaris</i> | APN 14086     | Na               | Turkiye |
| G40         | <i>Phaseolus vulgaris</i> | APN 14087     | Na               | Turkiye |
| G41         | <i>Phaseolus vulgaris</i> | APN 14088     | Na               | Turkiye |

|     |                           |           |                      |          |
|-----|---------------------------|-----------|----------------------|----------|
| G42 | <i>Phaseolus vulgaris</i> | APN 14090 | Na                   | Turkiye  |
| G43 | <i>Phaseolus vulgaris</i> | APN 14091 | Na                   | Turkiye  |
| G44 | <i>Phaseolus vulgaris</i> | APN 14092 | Na                   | Turkiye  |
| G45 | <i>Phaseolus vulgaris</i> | APN 14102 | Na                   | Turkiye  |
| G46 | <i>Phaseolus vulgaris</i> | APN 14104 | Na                   | Turkiye  |
| G47 | <i>Phaseolus vulgaris</i> | APN 14105 | Na                   | Turkiye  |
| G48 | <i>Phaseolus vulgaris</i> | APN 14106 | Na                   | Turkiye  |
| G49 | <i>Phaseolus vulgaris</i> | APN 14107 | Na                   | Turkiye  |
| G50 | <i>Phaseolus vulgaris</i> | APN 14108 | Na                   | Turkiye  |
| G51 | <i>Phaseolus vulgaris</i> | APN 14109 | Na                   | Turkiye  |
| G52 | <i>Phaseolus vulgaris</i> | APN 14111 | Na                   | Turkiye  |
| G53 | <i>Phaseolus vulgaris</i> | APN 14112 | Na                   | Turkiye  |
| G54 | <i>Phaseolus vulgaris</i> | APN 14116 | Na                   | Turkiye  |
| G55 | <i>Phaseolus vulgaris</i> | APN 14118 | Na                   | Turkiye  |
| G56 | <i>Phaseolus vulgaris</i> | APN 14120 | Na                   | Turkiye  |
| G57 | <i>Phaseolus vulgaris</i> | APN 14134 | Bekışli/ Eşme/ Uşak  | Turkiye  |
| G58 | <i>Phaseolus vulgaris</i> | APN 14138 | Antalya Pazar        | Turkiye  |
| G59 | <i>Phaseolus vulgaris</i> | APN 14140 | Na                   | Turkiye  |
| G60 | <i>Phaseolus vulgaris</i> | APN 14141 | Na                   | Turkiye  |
| G61 | <i>Phaseolus vulgaris</i> | Na        | Yumutalik/Adana      | Turkiye  |
| G62 | <i>Phaseolus vulgaris</i> | Na        | Akin                 | Turkiye  |
| G63 | <i>Phaseolus vulgaris</i> | Na        | Antalya Pazar        | Turkiye  |
| G64 | <i>Phaseolus vulgaris</i> | Na        | Aras 98              | Turkiye  |
| G65 | <i>Phaseolus vulgaris</i> | Na        | Bucak                | Turkiye  |
| G66 | <i>Phaseolus vulgaris</i> | Na        | Bulduk               | Turkiye  |
| G67 | <i>Phaseolus vulgaris</i> | Na        | Dimyat Gold          | Turkiye  |
| G68 | <i>Phaseolus vulgaris</i> | Na        | Dimyat Kara Fasulye  | Turkiye  |
| G69 | <i>Phaseolus vulgaris</i> | Na        | Gombe                | Turkiye  |
| G70 | <i>Phaseolus vulgaris</i> | Na        | Kacang Merah         | Turkiye  |
| G71 | <i>Phaseolus vulgaris</i> | Na        | Na                   | Cameroon |
| G72 | <i>Phaseolus vulgaris</i> | Na        | Na                   | Cameroon |
| G73 | <i>Phaseolus vulgaris</i> | Na        | Na                   | Cameroon |
| G74 | <i>Phaseolus vulgaris</i> | Na        | Na                   | Cameroon |
| G75 | <i>Phaseolus vulgaris</i> | Na        | Karasehir 90         | Turkiye  |
| G76 | <i>Phaseolus vulgaris</i> | Na        | Kayseri Develi       | Turkiye  |
| G77 | <i>Phaseolus vulgaris</i> | Na        | Kayseri Pinarbarbaşı | Turkiye  |
| G78 | <i>Phaseolus vulgaris</i> | Na        | Kayseri Yesil Kenk   | Turkiye  |
| G79 | <i>Phaseolus vulgaris</i> | Na        | Kayseri Yesilhisar   | Turkiye  |
| G80 | <i>Phaseolus vulgaris</i> | Na        | Local 10             | Turkiye  |
| G81 | <i>Phaseolus vulgaris</i> | Na        | Local 14             | Turkiye  |
| G82 | <i>Phaseolus vulgaris</i> | Na        | Local 5              | Turkiye  |
| G83 | <i>Phaseolus vulgaris</i> | Na        | Local 6              | Turkiye  |
| G84 | <i>Phaseolus vulgaris</i> | Na        | Local 7              | Turkiye  |
| G85 | <i>Phaseolus vulgaris</i> | Na        | Local 8              | Turkiye  |
| G86 | <i>Phaseolus vulgaris</i> | Na        | Local 9              | Turkiye  |
| G87 | <i>Phaseolus vulgaris</i> | Na        | Na                   | Malesia  |

|      |                           |    |                  |         |
|------|---------------------------|----|------------------|---------|
| G88  | <i>Phaseolus vulgaris</i> | Na | Na               | Malesia |
| G89  | <i>Phaseolus vulgaris</i> | Na | Na               | Malesia |
| G90  | <i>Phaseolus vulgaris</i> | Na | Na               | Turkiye |
| G91  | <i>Phaseolus vulgaris</i> | Na | Na               | Turkiye |
| G92  | <i>Phaseolus vulgaris</i> | Na | Na               | Turkiye |
| G93  | <i>Phaseolus vulgaris</i> | Na | Na               | Turkiye |
| G94  | <i>Phaseolus vulgaris</i> | Na | Na               | Turkiye |
| G95  | <i>Phaseolus vulgaris</i> | Na | Önceler 98       | Turkiye |
| G96  | <i>Phaseolus vulgaris</i> | Na | Ramuan Kering    | Turkiye |
| G97  | <i>Phaseolus vulgaris</i> | Na | Terzi Baba       | Turkiye |
| G98  | <i>Phaseolus vulgaris</i> | Na | Trabzon 2        | Turkiye |
| G99  | <i>Phaseolus vulgaris</i> | Na | Trabzon 4        | Turkiye |
| G100 | <i>Phaseolus vulgaris</i> | Na | Welda Enni Uzuu  | Turkiye |
| G101 | <i>Phaseolus vulgaris</i> | Na | Y. Turkay        | Turkiye |
| G102 | <i>Phaseolus vulgaris</i> | Na | Yar Ala Barbanya | Turkiye |
| G103 | <i>Phaseolus vulgaris</i> | Na | Yar Dermason     | Turkiye |
| G104 | <i>Phaseolus vulgaris</i> | Na | Yarutiye         | Turkiye |
| G105 | <i>Phaseolus vulgaris</i> | Na | Na               | Turkiye |
| G106 | <i>Phaseolus vulgaris</i> | Na | Nunhems BV       | Turkiye |
| G107 | <i>Phaseolus vulgaris</i> | Na | Nunhems BV       | Turkiye |
| G108 | <i>Phaseolus vulgaris</i> | Na | Nunhems BV       | Turkiye |
| G109 | <i>Phaseolus vulgaris</i> | Na | Nunhems BV       | Turkiye |
| G110 | <i>Phaseolus vulgaris</i> | Na | Nunhems BV       | Turkiye |
| G111 | <i>Phaseolus vulgaris</i> | Na | Nunhems BV       | Turkiye |
| G112 | <i>Phaseolus vulgaris</i> | Na | Nunhems BV       | Turkiye |
| G113 | <i>Phaseolus vulgaris</i> | Na | Nunhems BV       | Turkiye |
| G114 | <i>Phaseolus vulgaris</i> | Na | Nunhems BV       | Turkiye |
| G115 | <i>Phaseolus vulgaris</i> | Na | Na               | Italy   |
| G116 | <i>Phaseolus vulgaris</i> | Na | Na               | Italy   |
| G117 | <i>Phaseolus vulgaris</i> | Na | Na               | Italy   |
| G118 | <i>Phaseolus vulgaris</i> | Na | Antalya          | Turkiye |
| G119 | <i>Phaseolus vulgaris</i> | Na | Na               | France  |
| G120 | <i>Phaseolus vulgaris</i> | Na | Na               | Franca  |
| G121 | <i>Phaseolus vulgaris</i> | Na | Na               | France  |
| G122 | <i>Phaseolus vulgaris</i> | Na | Na               | France  |
| G123 | <i>Phaseolus vulgaris</i> | Na | Na               | France  |
| G124 | <i>Phaseolus vulgaris</i> | Na | Na               | France  |
| G125 | <i>Phaseolus vulgaris</i> | Na | Na               | France  |
| G126 | <i>Phaseolus vulgaris</i> | Na | Na               | Italy   |
| G127 | <i>Phaseolus vulgaris</i> | Na | Na               | Italy   |
| G128 | <i>Phaseolus vulgaris</i> | Na | Na               | Italy   |
| G129 | <i>Phaseolus vulgaris</i> | Na | Na               | Italy   |
| G130 | <i>Phaseolus vulgaris</i> | Na | Na               | Georgia |
| G131 | <i>Phaseolus vulgaris</i> | Na | Kursunlu/Antalya | Turkiye |
| G132 | <i>Phaseolus vulgaris</i> | Na | Na               | Turkiye |
| G133 | <i>Phaseolus vulgaris</i> | Na | Antalya          | Turkiye |

|      |                            |             |                   |                 |
|------|----------------------------|-------------|-------------------|-----------------|
| G134 | <i>Phaseolus vulgaris</i>  | Na          | Rize              | Turkiye         |
| G135 | <i>Phaseolus vulgaris</i>  | Na          | Na                | Turkiye         |
| G136 | <i>Phaseolus vulgaris</i>  | Na          | Na                | Georgia         |
| G137 | <i>Phaseolus vulgaris</i>  | Na          | Na                | Georgia         |
| G138 | <i>Phaseolus vulgaris</i>  | Na          | Na                | Georgia         |
| G139 | <i>Phaseolus vulgaris</i>  | Na          | Na                | Georgia         |
| G140 | <i>Phaseolus vulgaris</i>  | Na          | Na                | Georgia         |
| G141 | <i>Phaseolus vulgaris</i>  | Na          | Karacaşehir       | Turkiye         |
| G142 | <i>Phaseolus vulgaris</i>  | Na          | Na                | Turkiye         |
| G143 | <i>Phaseolus vulgaris</i>  | Na          | Na                | Turkiye         |
| G144 | <i>Phaseolus vulgaris</i>  | Na          | Konyaaltı/Antalya | Turkiye         |
| G145 | <i>Phaseolus vulgaris</i>  | Na          | Konyaaltı/Antalya | Turkiye         |
| G146 | <i>Phaseolus vulgaris</i>  | Na          | Seydikemer/Muğla  | Turkiye         |
| G147 | <i>Phaseolus vulgaris</i>  | Na          | Na                | Georgia         |
| G148 | <i>Phaseolus vulgaris</i>  | Na          | Nunhems BV        | Turkiye         |
| G149 | <i>Phaseolus vulgaris</i>  | Na          | Alanya/Antalya    | Turkiye         |
| G150 | <i>Phaseolus vulgaris</i>  | Na          | Alanya/Antalya    | Turkiye         |
| G151 | <i>Phaseolus vulgaris</i>  | Na          | Alanya/Antalya    | Turkiye         |
| G152 | <i>Phaseolus vulgaris</i>  | Na          | Alanya/Antalya    | Turkiye         |
| G153 | <i>Phaseolus vulgaris</i>  | Na          | Alanya/Antalya    | Turkiye         |
| G154 | <i>Phaseolus vulgaris</i>  | Na          | Alanya/Antalya    | Turkiye         |
| G155 | <i>Phaseolus vulgaris</i>  | Na          | Alanya/Antalya    | Turkiye         |
| G156 | <i>Phaseolus vulgaris</i>  | Na          | Dalaman/Muğla     | Turkiye         |
| G157 | <i>Phaseolus vulgaris</i>  | Na          | Oturak boysur     | Turkiye         |
| G158 | <i>Phaseolus vulgaris</i>  | Na          | Dalaman/Muğla     | Turkiye         |
| G159 | <i>Phaseolus vulgaris</i>  | APN 14003   | Na                | Turkiye         |
| G160 | <i>Phaseolus vulgaris</i>  | APN 14005   | Na                | Turkiye         |
| G161 | <i>Phaseolus vulgaris</i>  | APN 14006   | Na                | Turkiye         |
| G162 | <i>Phaseolus vulgaris</i>  | APN 14007   | Na                | Turkiye         |
| G163 | <i>Phaseolus vulgaris</i>  | APN 14008   | Na                | Turkiye         |
| G164 | <i>Phaseolus vulgaris</i>  | APN 14018   | Na                | Turkiye         |
| G165 | <i>Phaseolus vulgaris</i>  | Na          | Antalya           | Turkiye         |
| G166 | <i>Phaseolus vulgaris</i>  | Na          | Antalya           | Turkiye         |
| G167 | <i>Phaseolus vulgaris</i>  | Na          | Na                | Turkiye         |
| G168 | <i>Phaseolus vulgaris</i>  | Na          | Samsun            | Turkiye         |
| G169 | <i>Phaseolus vulgaris</i>  | Na          | Na                | Turkiye         |
| G170 | <i>Phaseolus vulgaris</i>  | APN 14011   | Na                | Turkiye         |
| G171 | <i>Phaseolus vulgaris</i>  | Pronkboon   | Groentezaden      | The Netherlands |
| G172 | <i>Phaseolus vulgaris</i>  | Na          | Na                | Turkiye         |
| G173 | <i>Phaseolus vulgaris</i>  | Dwarf bean  | Na                | Turkiye         |
| G174 | <i>Phaseolus vulgaris</i>  | Polka       | Na                | Turkiye         |
| G175 | <i>Phaseolus vulgaris</i>  | Stamslaboon | Groentezaden      | The Netherlands |
| G176 | <i>Phaseolus Hybr.</i>     | PI 413672   | Na                | Colombia        |
| G177 | <i>Phaseolus coccineus</i> | PI 535284   | Na                | Guatemala       |
| G178 | <i>Phaseolus coccineus</i> | PI 311211   | Na                | Guatemala       |
| G179 | <i>Phaseolus coccineus</i> | PI 257222   | Na                | Colombia        |

|      |                              |           |    |               |
|------|------------------------------|-----------|----|---------------|
| G180 | <i>Phaseolus coccineus</i>   | PI 317580 | Na | Guatemala     |
| G181 | <i>Phaseolus coccineus</i>   | PI 325594 | Na | Mexico        |
| G182 | <i>Phaseolus acutifolius</i> | PI 319447 | Na | Mexico        |
| G183 | <i>Phaseolus acutifolius</i> | PI 239056 | Na | Morocco       |
| G184 | <i>Phaseolus acutifolius</i> | PI 477033 | Na | United State  |
| G185 | <i>Phaseolus acutifolius</i> | PI 309881 | Na | Costa Rica    |
| G186 | <i>Phaseolus acutifolius</i> | PI 535202 | Na | United States |
| G187 | <i>Phaseolus acutifolius</i> | PI 535236 | Na | United States |
| G188 | <i>Phaseolus acutifolius</i> | PI 307802 | Na | El Salvador   |
| G189 | <i>Phaseolus acutifolius</i> | PI 312198 | Na | Mexico        |
| G190 | <i>Phaseolus lunatus</i>     | PI 299389 | Na | Brazil        |
| G191 | <i>Phaseolus lunatus</i>     | PI 256423 | Na | El Salvador   |
| G192 | <i>Phaseolus lunatus</i>     | PI 195341 | Na | Guatemala     |
| G193 | <i>Phaseolus lunatus</i>     | PI 256820 | Na | Ecuador       |
| G194 | <i>Phaseolus lunatus</i>     | PI 257409 | Na | Costa Rica    |
| G195 | <i>Phaseolus dumosus</i>     | PI 311196 | Na | Guatemala     |
| G196 | <i>Phaseolus dumosus</i>     | PI 201323 | Na | Mexico        |

---

APN: Akdeniz University collection number; PI: Plant Introduction number in USDA GRIN;  
Na: Information not available.
