# Supplementary material
Source: MDPI journal article supplement (https://www.mdpi.com/2077-0472/13/5/953)

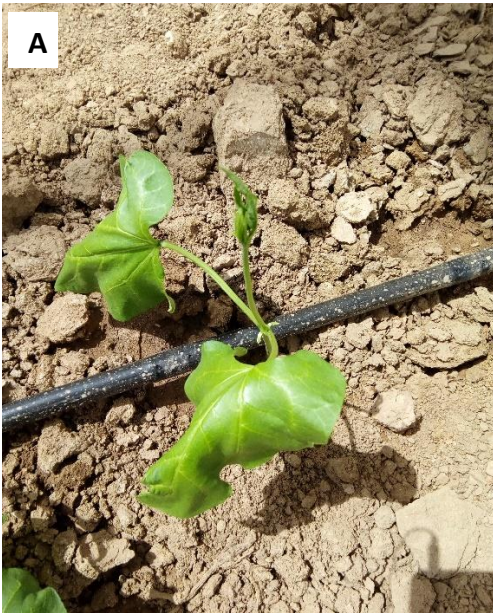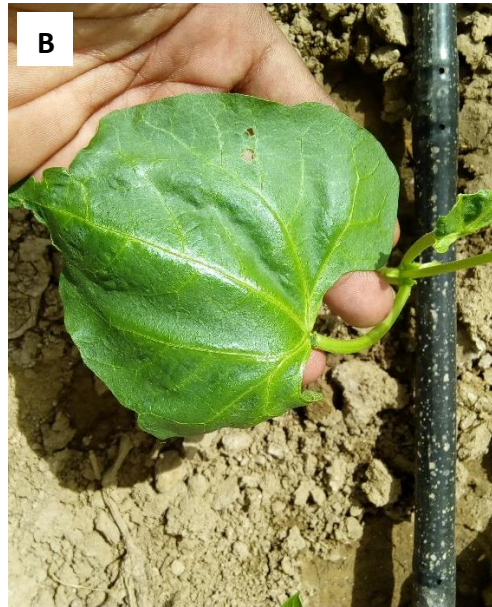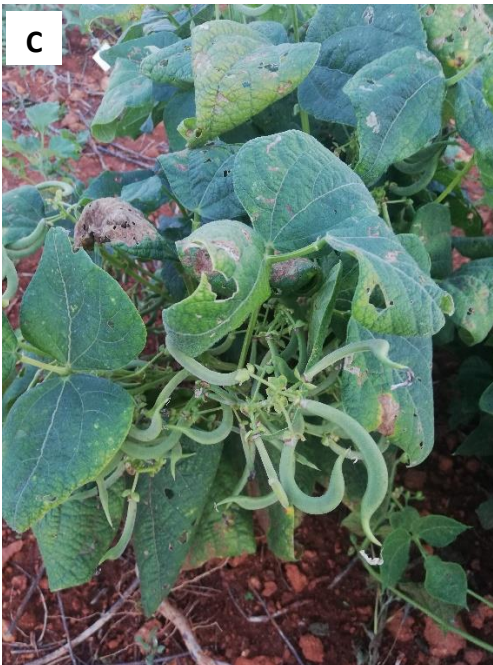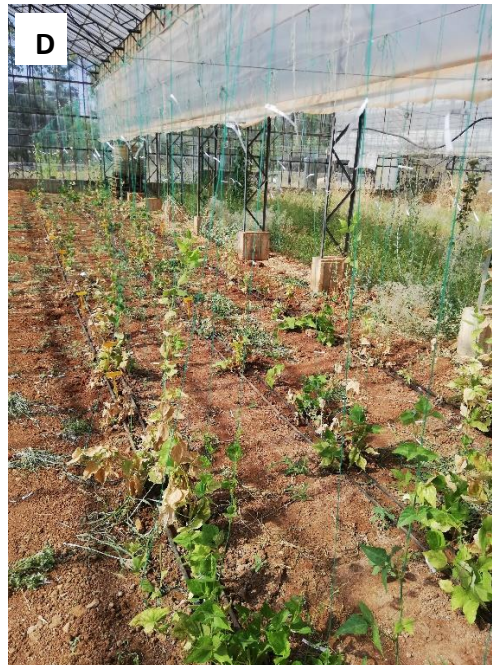

**Figure S1:** Effects of heat stress on the *Phaseolus* beans leaves (A and B), pods (C), and Whole plant (D).

Supplement: s1 [file s1]
